# Supplementary material for: Typology of Parent-to-Child Emotions: A Study of Japanese Parents of a Foetus up to a 12-Year-Old Child
Source: MDPI journal article supplement (doi:10.3390/healthcare12090881), 2024-04-24
Supplement: s1 [file s1]

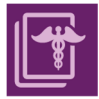**Supplementary Table S1.** Cross table for each segment with cluster, and chi-squared test for parents' gender among parents belonging same range of child's age.

|                                                                 | Cluster 1:<br>Lack of<br>Bonding<br>Emotions<br><i>n</i> = 509<br>(11.1%) | Cluster 2:<br>Bonding<br>Disorder<br><i>n</i> = 1471<br>(32.0%) | Cluster 3:<br>Ambivalent<br>Bonding<br><i>n</i> = 1211<br>(26.3%) | Cluster 4:<br>Positive<br>Bonding<br><i>n</i> = 1409<br>(30.6%) | $\chi^2$ ( <i>df</i> )   |
|-----------------------------------------------------------------|---------------------------------------------------------------------------|-----------------------------------------------------------------|-------------------------------------------------------------------|-----------------------------------------------------------------|--------------------------|
| Segment                                                         | <i>n</i> (%)                                                              | <i>n</i> (%)                                                    | <i>n</i> (%)                                                      | <i>n</i> (%)                                                    |                          |
| 1: 1 <sup>st</sup> trimester, father ( <i>n</i> = 126 [100.0%]) | 18 (14.3)                                                                 | 72 (57.1)                                                       | 18 (14.3)                                                         | 18 (14.3)                                                       | 4.57 (3) <sup>NS</sup>   |
| 2: 1 <sup>st</sup> trimester, mother ( <i>n</i> = 48 [100.0%])  | 8 (16.7)                                                                  | 21 (43.7)                                                       | 6 (12.5)                                                          | 13 (27.1)                                                       |                          |
| 3: 2 <sup>nd</sup> trimester, father ( <i>n</i> = 210 [100.0%]) | 17 (8.1)                                                                  | 126 (60.0)                                                      | 29 (13.8)                                                         | 38 (18.1)                                                       | 79.82 (3) <sup>***</sup> |
| 4: 2 <sup>nd</sup> trimester, mother ( <i>n</i> = 216 [100.0%]) | 44 (20.4)                                                                 | 39 (18.0)                                                       | 52 (24.1)                                                         | 81 (37.5)                                                       |                          |
| 5: 3 <sup>rd</sup> trimester, father                            | 51 (20.4)                                                                 | 64 (25.6)                                                       | 28 (11.2)                                                         | 107 (42.8)                                                      | 13.42 (3) <sup>*</sup>   |
| 6: 3 <sup>rd</sup> trimester, mother                            | 49 (19.6)                                                                 | 34 (13.6)                                                       | 42 (16.8)                                                         | 125 (50.0)                                                      |                          |
| 7: 0 to 1 months old, father                                    | 36 (14.4)                                                                 | 68 (27.2)                                                       | 47 (18.8)                                                         | 99 (39.6)                                                       | 15.88 (3) <sup>**</sup>  |
| 8: 0 to 1 months old, mother                                    | 25 (10.0)                                                                 | 51 (20.4)                                                       | 85 (34.0)                                                         | 89 (35.6)                                                       |                          |
| 9: 2 to 6 months old father                                     | 19 (7.6)                                                                  | 67 (26.8)                                                       | 62 (24.8)                                                         | 102 (40.8)                                                      | 9.96 (3) <sup>*</sup>    |
| 10: 2 to 6 months old mother                                    | 18 (7.2)                                                                  | 42 (16.8)                                                       | 87 (34.8)                                                         | 103 (41.2)                                                      |                          |
| 11: 7 to 17-months old, father                                  | 32 (12.8)                                                                 | 56 (22.4)                                                       | 63 (25.2)                                                         | 99 (39.6)                                                       | 12.31 (3) <sup>**</sup>  |
| 12: 7 to 17 months old, mother                                  | 16 (6.4)                                                                  | 66 (26.4)                                                       | 88 (35.2)                                                         | 80 (32.0)                                                       |                          |
| 13: 18 months to 2 years old, father                            | 26 (10.4)                                                                 | 91 (36.4)                                                       | 66 (26.4)                                                         | 67 (26.8)                                                       | 9.51 (3) <sup>*</sup>    |
| 14: 18 months to 2 years old, mother                            | 10 (4.0)                                                                  | 94 (37.6)                                                       | 84 (33.6)                                                         | 62 (24.8)                                                       |                          |
| 15: 3 to 5 years old, father                                    | 19 (7.6)                                                                  | 92 (36.8)                                                       | 70 (28.0)                                                         | 69 (27.6)                                                       | 4.17 (3) <sup>NS</sup>   |
| 16: 3 to 5 years old, mother                                    | 19 (7.6)                                                                  | 90 (36.0)                                                       | 88 (35.2)                                                         | 53 (21.2)                                                       |                          |
| 17: 6 to 8 years old, father                                    | 29 (11.6)                                                                 | 86 (34.4)                                                       | 66 (26.4)                                                         | 69 (27.6)                                                       | 15.17 (3) <sup>**</sup>  |
| 18: 6 to 8 years old, mother                                    | 19 (7.6)                                                                  | 112 (44.8)                                                      | 80 (32.0)                                                         | 39 (15.6)                                                       |                          |
| 19: 9 to 12 years old, father                                   | 32 (12.8)                                                                 | 93 (37.2)                                                       | 66 (26.4)                                                         | 59 (23.6)                                                       | 10.03 (3) <sup>*</sup>   |
| 20: 9 to 12 years old, mother                                   | 22 (8.8)                                                                  | 107 (42.8)                                                      | 84 (33.6)                                                         | 37 (14.8)                                                       |                          |

Note. The number of cases belonging to each segment 5 to 20 is 250. \**p* < .05; \*\*, *p* < .01 \*\*\*; *p* < .001; <sup>NS</sup>, not significant.

**Supplementary Table S2.** Cross table for combinations of parents' gender and child's gender with clusters.

| combination<br>Parents' gender × Child's<br>gender |                     | Cluster 1:<br><br>Lack of<br>Bonding<br>Emotions | Cluster 2:<br><br>Bonding<br>Disorder | Cluster 3:<br><br>Ambivalent<br>Bonding | Cluster 4:<br><br>Positive<br>Bonding | total        |
|----------------------------------------------------|---------------------|--------------------------------------------------|---------------------------------------|-----------------------------------------|---------------------------------------|--------------|
|                                                    |                     | 509 (11.1%)                                      | 1471 (32.0%)                          | 1211 (26.3%)                            | 1409 (30.6)                           | 4600 (100.0) |
|                                                    |                     | <i>n</i> (%)                                     | <i>n</i> (%)                          | <i>n</i> (%)                            | <i>n</i> (%)                          | <i>n</i> (%) |
| Combination<br>1                                   | Father x boys       | 127 (10.9)                                       | 418 (36.0)                            | 264 (22.7)                              | 353 (30.4)                            | 1162 (100.0) |
| Combination<br>2                                   | Father x girls      | 136 (13.1)                                       | 329 (32.0)                            | 228 (22.2)                              | 336 (32.7)                            | 1029 (100.0) |
| Combination<br>3                                   | Father x<br>unknown | 16 (11.0)                                        | 68 (46.9)                             | 23 (15.9)                               | 38 (26.2)                             | 145 (100.0)  |
| Combination<br>4                                   | Mother x boys       | 103 (9.4)                                        | 322 (29.4)                            | 346 (31.6)                              | 325 (29.6)                            | 1096 (100.0) |
| Combination<br>5                                   | Mother x girls      | 106 (10.0)                                       | 303 (28.7)                            | 330 (31.2)                              | 318 (30.1)                            | 1057 (100.0) |
| Combination<br>6                                   | Mother x<br>unknown | 21 (18.9)                                        | 31 (28.0)                             | 20 (18.0)                               | 39 (35.1)                             | 111 (100.0)  |

Note.  $\chi^2$  (df) = 296.64 (15),  $p < .001$ .
